# Supplementary material for: Prospective diagnostic and prognostic study of copeptin in suspected acute aortic syndromes
Source: PubMed Central journal article supplement (PMC6233166; doi:10.1038/s41598-018-35016-z), 2018-11-13
Supplement: 41598_2018_35016_MOESM1_ESM.pdf [file 41598_2018_35016_MOESM1_ESM.pdf]

## **Prospective diagnostic and prognostic study of copeptin in suspected acute aortic syndromes**

Fulvio Morello<sup>1\*</sup>, Matteo Oddi<sup>1</sup>, Giulia Cavalot<sup>2</sup>, Alice Ianniello<sup>3</sup>, Francesca Giachino<sup>1</sup>, Peiman Nazerian<sup>4</sup>,  
Stefania Battista<sup>1</sup>, Corrado Magnino<sup>1</sup>, Maria Tizzani<sup>1</sup>, Fabio Settanni<sup>3</sup>, Giulio Mengozzi<sup>3</sup>, Enrico Lupia<sup>1</sup>.

<sup>1</sup>S.C.U. Medicina d'Urgenza, A.O.U. Città della Salute e della Scienza, Molinette Hospital, Torino, Italy.

<sup>2</sup>S.C.U. Medicina Interna 2, A.O.U. Città della Salute e della Scienza, Molinette Hospital, Torino, Italy.

<sup>3</sup>S.C. Biochimica Clinica, A.O.U. Città della Salute e della Scienza, Molinette Hospital, Torino, Italy.

<sup>4</sup>D.E.A., A.O.U. Careggi, Firenze, Italy.

### **SUPPLEMENTAL MATERIAL**

## SUPPLEMENTAL TABLES

**Supplemental table 1.** Diagnostic accuracy of copeptin and D-dimer for different subtypes of acute aortic syndrome.

| Subtype | ROC curve AUC (95% CI) |                     | <i>P</i> -value |
|---------|------------------------|---------------------|-----------------|
|         | copeptin               | D-dimer             |                 |
| A-AAD   | 0.825 (0.763-0.888)    | 0.961 (0.939-0.983) | <0.001          |
| B-AAD   | 0.8 (0.691-0.909)      | 0.933 (0.891-0.974) | 0.035           |
| IMH     | 0.726 (0.611-0.842)    | 0.808 (0.696-0.92)  | 0.17            |
| SAR     | 0.921 (0.836-1)        | 0.946 (0.908-0.983) | 0.69            |
| PAU     | 0.762 (0.426-1)        | 0.758 (0.581-0.936) | 0.95            |

A-AAD: type A acute aortic dissection, B-AAD: type B acute aortic dissection, IMH: intramural aortic hematoma, SAR: spontaneous aortic rupture, PAU: penetrating aortic ulcer. *P*-value was calculated according to DeLong.

**Supplemental table 2.** Sensitivity of copeptin for adjudicated diagnoses.

| Diagnosis              |                     | n  | sensitivity % (95% CI)    |                           |
|------------------------|---------------------|----|---------------------------|---------------------------|
|                        |                     |    | copeptin $\geq 10$ pmol/L | copeptin $\geq 14$ pmol/L |
| Acute aortic syndromes | A-AAD               | 59 | 84.8% (73.5-91.8)         | 83.1% (71-91.6)           |
|                        | B-AAD               | 20 | 65% (43.3-81.9)           | 55% (31.5-76.9)           |
|                        | IMH                 | 17 | 82.4% (59-93.8)           | 76.5% (50.1-93.2)         |
|                        | SAR                 | 5  | 100% (56.6-100)           | 100% (47.8-100)           |
|                        | PAU                 | 3  | 66.7% (20.8-93.9)         | 66,7 (9.4-99.2)           |
| Alternative diagnoses  | MS pain             | 93 | 21.5% (14.4-30.9)         | 11.8% (6.7-20)            |
|                        | GI disease          | 26 | 26.9% (13.7-46.1)         | 23.1% (11-42.1)           |
|                        | ACS                 | 19 | 73.7% (51.2-88.2)         | 57.9% (36.3-76.9)         |
|                        | Uncompl. aneurism   | 11 | 36.4% (15.2-64.6)         | 27.3% (9.7-56.6)          |
|                        | Pleuritis/pneumonia | 9  | 77.8% (45.3-93.7)         | 77.8% (45.3-93.7)         |
|                        | Syncope             | 7  | 71.4% (35.9-91.8)         | 42.9% (15.8-75)           |
|                        | Pericarditis        | 6  | 50% (18.8-81.2)           | 33.3% (9.7-70)            |
|                        | Stroke              | 3  | 66.7% (20.8-93.9)         | 66.7% (20.8-93.9)         |
|                        | PE                  | 2  | 0% (0-65.8)               | 0% (0-65.8)               |
|                        | Other diagnoses     | 33 | 42.4% (27.2-59.2)         | 24.2% (12.8-41)           |

95% CI: 95% confidence interval. A-AAD: type A acute aortic dissection, B-AAD: type B acute aortic dissection, IMH: intramural aortic hematoma, SAR: spontaneous aortic rupture, PAU: penetrating aortic ulcer. ACS: acute coronary syndrome, GI: gastro-intestinal, MS: muscle-skeletal pain, PE: pulmonary embolism.

**SUPPLEMENTAL FIGURE 1**

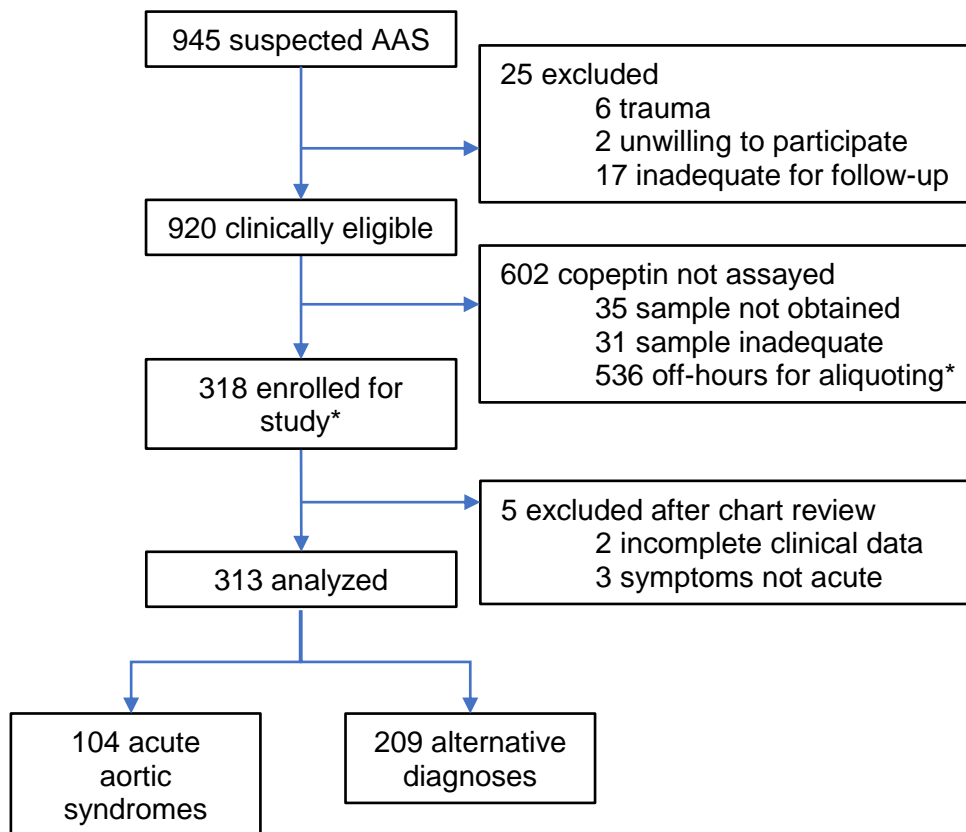

**Supplemental figure 1. Study flowchart.** \*318 clinically eligible patients were enrolled and subjected to copeptin assay. See Method section for convenience sampling details.
